# Supplementary material for: Efficacy of Kami Guibi-tang as an Add-On Therapy to Acetylcholinesterase Inhibitor for Cognitive Function in Mild Alzheimer's Disease: A Pilot Study
Source: Evid Based Complement Alternat Med. 2023 Jan 30;2023:4846770. doi: 10.1155/2023/4846770 (PMC9902163; doi:10.1155/2023/4846770)
Supplement: Supplementary Materials — Table S1: contents of the SNSB-D. Table S2: CONSORT 2010 Checklist. [file 4846770.f1.zip]

Archive with 2 entries (2 files):
- Table S1. Contents of SNSB-D.docx
- Table S2. CONSORT 2010 Checklist.doc
